# Supplementary material for: The hidden barrier to poverty alleviation: aporophobia and the rise of neoliberalism morality among youth
Source: Research Square preprint supplement (doi:10.21203/rs.3.rs-6429946/v1), 2025-06-11
Supplement: Supplementary file 1 [file 22c844325c1899a0f4efc7fe.docx]

**Appendix**

BLOCK 1

From the following statements, indicate your degree of agreement or disagreement.

[Answers from Strongly disagree to strongly agree]

| No. | Question content | Short name |
| --- | --- | --- |
| Q1_1 | Your country is very unequal | Country Inequality |
| Q1_2 | The income differences between the rich and the poor are very high in your country | Income Differences |
| Q1_3 | There are people who are naturally superior to others | Natural Superiority |
| Q1_4 | It is fair that people who belong to a higher class be richer because of their higher skills | Higher Class Skills |
| Q1_5 | It is fair that people who belong to a higher class be richer because they work very hard | Higher Class Hard Work |
| Q1_6 | In this society people are very concerned about being judged by other people | Concern About Judgment |
| Q1_7 | People at the top of the social ladder are very important | Importance of Top Social Ladder |
| Q1_8 | People compare themselves with others very often | Frequent Comparisons |
| Q1_9 | Many people fear being socially rejected if they do not have enough money | Fear of Social Rejection |
| Q1_10 | Talents determine one’s position in the social hierarchy | Talents Determine Position |
| Q1_11 | One’s position in the social hierarchy determines one’s abilities | Position Determines Abilities |
| Q1_12 | The rich are more stressed than the poor | Rich More Stressed |
| Q1_13 | Those who appear to be from lower classes are less capable and less trustworthy in their work | Lower Class Less Capable |
| Q1_14 | The poor are poor because they are lazy | Poor Are Lazy |
| Q1_15 | Good manners are an easy way to identify good social status | Manners Reflect Status |
| Q1_16 | People’s social status reflect how worthy they are as individuals | Status Reflects Worth |
| Q1_17 | Big corporations should pay higher taxes | Higher Taxes for Corporations |
| Q1_18 | People who want to tax big companies are envious of their success | Envy of Corporate Success |

BLOCK 2

Imagine that you have a friend or a colleague who is making the following remarks. How much do you agree with his or her ideas? Indicate your degree of agreement or disagreement with the remarks below.

[Answers from Strongly disagree to strongly agree]

| No. | Question content | Short name |
| --- | --- | --- |
| Q2_1 | The poor have fewer resources but are happy in their own way | Poor Are Happy |
| Q2_2 | The poor know how to earn their living, therefore we do not have to help them | Poor Can Earn Living |
| Q2_3 | The poor do not work because they prefer to have more free time | Poor Prefer Free Time |
| Q2_4 | The poor do not smell nicely because of tough sanitary conditions | Poor Smell Bad |
| Q2_5 | The poor should receive special treatment by governments because they need help | Poor Need Gov Help |
| Q2_6 | I normally do not pay attention to what the poor say | Ignore Poor's Words |
| Q2_7 | Poor people are not as worthy as rich people | Poor Less Worthy |
| Q2_8 | I avoid going to the same places that the poor go to | Avoid Poor Places |
| Q2_9 | When I go to places where there are poor people I avoid looking at them | Avoid Looking at Poor |
| Q2_10 | People from the lower classes have the same good manners as people from other upper classes | Poor Have Good Manners |
| Q2_11 | It is embarrassing for people of higher status to eat together with people of lower status | Embarrassed to Eat with Poor |
| Q2_12 | The opinions of the poor are as good as the opinions of other people. In other words, they are worth the same as ours | Poor Opinions Equal |
| Q2_13 | There is nothing to fear in poor neighbourhoods, they are just like any other | Poor Neighborhoods Are Safe |
| Q2_14 | The poor are responsible for some of our problems because they do not contribute to society as we do | Poor Cause Problems |
| Q2_15 | Sometimes it is natural to show the poor how angry it makes us that they are such a drag to society | Express Anger at Poor |
| Q2_16 | The poor are parasites of society and we should do something about it | Poor Are Parasites |
| Q2_17 | If I could, I would insult poor people who live nearby so that they would understand they need to work | Insult Poor to Make Them Work |
| Q2_18 | Beggars are the worst kind of poor because they are dirty | Beggars Are Worst Kind |
| Q2_19 | I don’t have time for poor people, they do nothing and have all the time in the world | No Time for Poor |
| Q2_20 | Governments should work for the average citizen, not for the poor | Gov Should Serve Average |
| Q2_21 | I punched a poor person on the face once, but he deserved it because he should have cleared out | Punched Poor Deserved It |
| Q2_22 | The poor are just people like us | Poor Are Like Us |

BLOCK 3

| Q3_1 | Imagine the following situation. Maria is the owner of a small supermarket that caters for wealthy clients, some of them foreigners, in your city. She is interviewing different candidates for the post of cashier, each with different profiles and qualities. | |
| --- | --- | --- |
|  | The first candidate comes from Norway; he has completed secondary school, speaks fluent Spanish, seems reliable, friendly and has all the qualifications for the job. The second candidate comes from Kazakhstan with a very similar profile. He has also finished secondary school and studied one extra year. He also speaks fluent Spanish, seems reliable, friendly and has all the qualifications for the job. The third candidate is Spanish and he has also attended secondary school, seems reliable, friendly person and has all the qualifications for the job. | |
| Q3_2 | Which candidate would you choose for the post in her place and why? | [Answers: the first candidate, the second candidate, the third candidate] |
| Q3_3 | Why? | [Open answer] |
| Q3_4 | Do you think that your country should limit migration of high skilled people? | [Answers: Yes, No, I don’t know] |
| Q3_5 | Do you think that your country should limit migration of low skilled people? | [Answers: Yes, No, I don’t know] |
| Q3_6 | Where is your family in the social hierarchy of your country? | [Answers: Top, Upper Middle, Middle, Lower Middle, Bottom] |
| Q3_7 | What is the best marker of status among your friends? Select only one | [Answers: they do not have a big house, they have to take public transport, they cannot go on holidays, they do not have nice clothes or personal objects, such as nice watches, they do not have good electronics, they live with shame, they do not have good food to eat] |
| Q3_8 | What is the worst in the lives of the poor? Select only one | [Answers: big house, expensive car, luxury holidays, sophisticated brands of clothing, luxury electronic gadgetry, sophisticaed watches, other] |
| Q3_9 | What are the elements that make people seem inferior in your country? (Mark the highest ‘1’, the second highest ‘2’, the third highest ‘3’ , then the fourth highest '4' and the last ‘5’) | [Elements to rate: having a darker skin, belonging to a different religion, being a foreigner, not speaking the language of the country, low education level] |

BLOCK 4

| Q4_1 | What is your age? | [Open answer] |
| --- | --- | --- |
| Q4_2 | What is your gender? | [Answers: Male, Female, Other] |
| Q4_3 | What is your marital status? | [Answers: single, married or living together with partner, divorced, widowed] |
| Q4_4 | What is your occupation status? | [Answers: student, trainee, part-time job, full-time job, unemployed, retired] |
| Q4_5 | Were you born in Spain? | [Answers: Yes, No] |
| Q4_6 | If you were born in Spain, what is the zip code of your place of birth? | [Open answer] |
| Q4_7 | What is approximately the range of the monthly gross income of your family? Remember, data will be totally confidential. | [Answers: lower than 1.000 euros per month, between 1.000 and 2.000 euros per month, between 2.000 and 4.000 euros per month, between 4.000 and 6.000 euros per month, between 6.000 and 8.000 euros per month, between 8.000 and 10.000 euros per month, between 10.000 euros and 15.000 euros per month, between 15.000 and 20.000 euros per month, more than 20.000 euros per month] |
| Q4_8 | How many members actively contribute to that income? | [Open answer] |
| Q4_9 | Do you consider yourself religious? | [Answers from 0 to 10] |
